# Supplementary material
Source: Frontiers journal article supplement (https://www.frontiersin.org/articles/311392)
Supplement: Image_2.PDF [file Image_2.PDF]

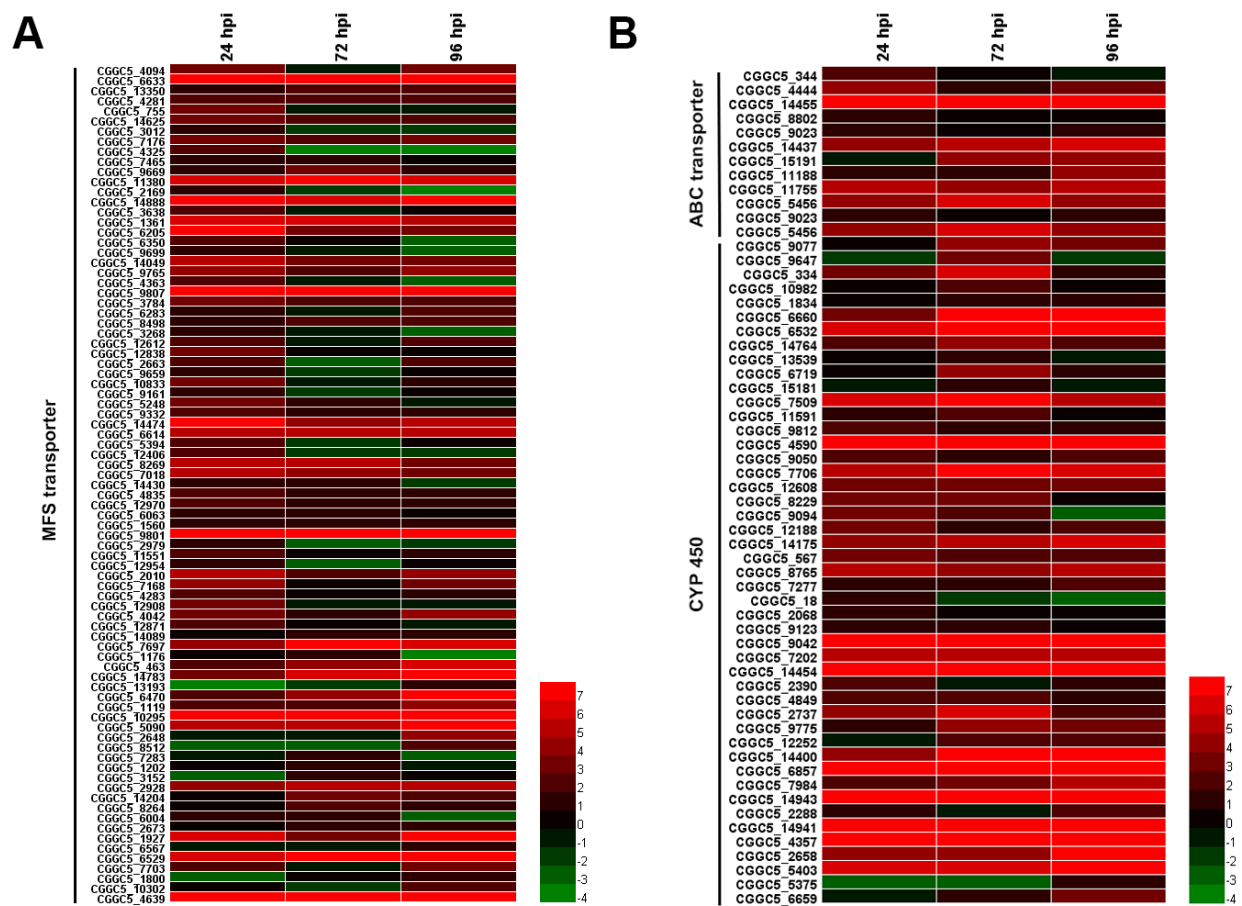

**Figure S2.** Heat map showing the expression patterns of MFS transporter (A), ABC transporter and CYP450 (B) genes. The color bars represent the values of log<sub>2</sub>-fold change (infected leaves at 24, 72 and 96 hpi vs. mycelium grown in PDA medium), ranging from green (-4) to red (7)
